# Supplementary material
Source: publisher figshare collection journal article supplement (https://diabetesjournals.figshare.com/ndownloader/files/22977923)
Supplement: Supplementary file 1 [file 22977923]

## Sheet: Supplementary Table C
	Supplementary Table 5
	Trait name	GWAS data source	Beta	SE	Z	P	Bonferroni corrected P
	Hip circumference	UKBB	-0.0071071	0.0017462	-4.07	5.03e-05	0.0027665
	Leg fat mass	UKBB	-0.006797	0.0017327	-3.923	9.28e-05	0.005104
	Whole body fat mass	UKBB	-0.0067705	0.001742	-3.887	0.000108	0.00594
	Leg fat percentage	UKBB	-0.0066017	0.0017357	-3.803	0.00015	0.00825
	Trunk fat percentage	UKBB	-0.0063604	0.0017474	-3.64	0.000285	0.015675
	Body fat percentage	UKBB	-0.0062823	0.0017422	-3.606	0.000324	0.01782
	Trunk fat mass	UKBB	-0.0061721	0.0017456	-3.536	0.000423	0.023265
	Body mass index	UKBB	-0.0060821	0.0017238	-3.528	0.000435	0.023925
	Arm fat mass	UKBB	-0.0060962	0.0017355	-3.513	0.000461	0.025355
	Arm fat percentage	UKBB	-0.0058804	0.0017238	-3.411	0.000669	0.036795
	LDL levels	PMID: 24097068	0.0017827	0.0017375	1.026	0.30509	1
	TC levels	PMID: 24097068	0.000997	0.0017317	0.576	0.56489	1
	TG levels	PMID: 24097068	0.0007864	0.0017188	0.458	0.6474	1
	T2D adj. BMI	PMID: 28566273	-0.0011252	0.0017417	-0.646	0.51839	1
	T2D	PMID: 28566273	-0.0017667	0.0018099	-0.976	0.3292	1
	HDL levels	PMID: 24097068	0.0008974	0.0017109	0.525	0.60002	1
	HbA1c level	PMID: 28898252	-0.0010796	0.0018238	-0.592	0.55399	1
	Intelligence	PMID: 29942086	0.0003342	0.0017291	0.193	0.84678	1
	White blood cell (leukocyte) count	UKBB	-0.0027549	0.0017	-1.621	0.10539	1
	Walking for pleasure	UKBB	-0.0018526	0.0017519	-1.057	0.29052	1
	Types of physical activity in last 4 weeks: Other exercises (eg: swimming, cycling, keep fit, bowling)	UKBB	8.923e-05	0.001731	0.052	0.9589	1
	Treatment/medication code: metformin	UKBB	-0.0006877	0.0017192	-0.4	0.68923	1
	Treatment/medication code: gliclazide	UKBB	0.0014781	0.0017231	0.858	0.39118	1
	Time spent watching television (TV)	UKBB	-0.0036907	0.0017291	-2.134	0.03302	1
	Time spend outdoors in summer	UKBB	-0.0006808	0.0017398	-0.391	0.69564	1
	Standing height	UKBB	0.0023326	0.0017394	1.341	0.18016	1
	Smoking status: Never	UKBB	-0.0006052	0.001755	-0.345	0.73025	1
	Sitting height	UKBB	0.0006224	0.0017281	0.36	0.71879	1
	Qualifications: A levels/AS levels or equivalent	UKBB	0.0019425	0.0017528	1.108	0.26798	1
	Past tobacco smoking	UKBB	-0.0023004	0.0017397	-1.322	0.186342	1
	Non-cancer illness code, self-reported: pulmonary embolism +/- dvt	UKBB	-0.0005347	0.0017755	-0.301	0.76335	1
	Mood swings	UKBB	-0.0025423	0.0017033	-1.493	0.13583	1
	Length of mobile phone use	UKBB	0.0004495	0.0017304	0.26	0.7951	1
	Impedance of whole body	UKBB	0.0022591	0.0017506	1.29	0.19716	1
	Impedance of arm	UKBB	0.0019421	0.0017491	1.11	0.26708	1
	Immature reticulocyte fraction	UKBB	-0.0041497	0.0017585	-2.36	0.018455	1
	Illnesses of mother: Diabetes	UKBB	-0.0006622	0.0017319	-0.382	0.70225	1
	High light scatter reticulocyte count	UKBB	-0.002773	0.0017252	-1.607	0.108264	1
	Height	PMID: 25282103	0.001313	0.0019304	0.68	0.49654	1
	Frequency of tiredness / lethargy in last 2 weeks	UKBB	-0.0039089	0.0017231	-2.268	0.02349	1
	Fluid intelligence score	UKBB	0.0013705	0.001712	0.801	0.42356	1
	Fed-up feelings	UKBB	-0.0016616	0.0017098	-0.972	0.33136	1
	Fasting Insulin adj. BMI	PMID: 22885924	-0.0010438	0.0017338	-0.602	0.54728	1
	Fasting Insulin	PMID: 22885924	-0.0008637	0.0017072	-0.506	0.61302	1
	Fasting Glucose	PMID: 22885924	0.0008813	0.001778	0.496	0.6202	1
	Education Qualifications: None of the above	UKBB	-0.0011474	0.0017186	-0.668	0.5045	1
	Deep venous thrombosis	UKBB	0.0021346	0.0017158	1.244	0.213735	1
	Cereal type: Muesli	UKBB	0.0020484	0.0017369	1.179	0.23851	1
	Blood clot in the leg	UKBB	0.0023208	0.0017256	1.345	0.178935	1
	Birth weight	UKBB	0.0031699	0.0017266	1.836	0.06663	1
	Age when periods started	UKBB	-0.0016858	0.0017777	-0.948	0.34318	1
	Age high blood pressure diagnosed	UKBB	0.0008702	0.0017139	0.508	0.61172	1
	Age first had sexual intercourse	UKBB	0.0001563	0.0017709	0.088	0.92968	1
	Age completed full time education	UKBB	0.0021459	0.0017458	1.229	0.21927	1
	Age at first live birth	UKBB	0.0010706	0.0017725	0.604	0.54597	1
